# Supplementary material for: Syp1 regulates the clathrin-mediated and clathrin-independent endocytosis of multiple cargo proteins through a novel sorting motif
Source: PubMed Central journal article supplement — Mol Biol Cell. 2017 Sep 1;28(18):2434–48. doi: 10.1091/mbc.E15-10-0731 (PMC5576906; doi:10.1091/mbc.e15-10-0731), 2017-09-01
Supplement: supp_E15-10-0731v1_E15-10-0731CombinedSupMats.pdf [file supp_E15-10-0731v1_E15-10-0731CombinedSupMats.pdf]

# Supplemental Materials

*Molecular Biology of the Cell*

Apel et al.

**Figure S1.** (A) Immunoblot of recombinant binding assay in which WT and mutant Mid2<sup>273-376</sup> (WY>AAA) fragments were tested for binding to an immobilized GST negative control or GST-Syp1  $\mu$ HD; top: long exposure anti-His<sub>6</sub> immunoblot, middle: short exposure anti-His<sub>6</sub> immunoblot, bottom: GelCode Blue (Coomassie) protein stain. (L: loading control, S: supernatant, P: pelleted fraction). (B) Immunoblot of binding assay in which GST and GST-Syp1  $\mu$ HD were treated with either WT His<sub>6</sub>-Snc1<sup>1-93</sup> or a mutant in which the DPY motif was mutated to KPA (L: loading control, S: supernatant, P: pelleted fraction). (C) Immunoblot of binding assay in which GST and GST-Syp1  $\mu$ HD were treated with either WT His<sub>6</sub>-Snc1<sup>63-93</sup> or a mutant in which the WY motif was mutated to alanines (L: loading control, S: supernatant, P: pelleted fraction). (D) Cells expressing full-length Mid2-GFP, Mid2 <sup>$\Delta$ 286</sup>-GFP, or Mid2 <sup>$\Delta$ 289</sup>-GFP were grown on minimal medium and imaged via live-cell fluorescence microscopy. Scale bar, 2  $\mu$ m.

**Figure S2.** (A) Reconstructed WT and *syp1* $\Delta$  cells expressing candidate cargos tagged with GFP in strain background W303 were grown on rich medium and imaged via live-cell fluorescence microscopy. Scale bar, 2  $\mu$ m. (B) Full-length candidate cargo sequences were analyzed using the SPOCTOPUS membrane protein topology prediction algorithm. DxY motifs in regions of proteins that are predicted to be cytoplasmic are indicated in black; in the absence of a DxY motif in these regions, Dx $\Phi$  and ExY sequences are indicated. One DxY motif residing in a region predicted to be extracellular is indicated in red (Inside: cytoplasmic, Outside: extracellular, TM-Helix: transmembrane).

**Figure S3.** (A) Cells expressing Ptr2-GFP or Mep3-GFP were treated with vehicle (DMSO) or Latrunculin A (LatA) prior to imaging by live-cell fluorescence microscopy. Scale bar, 2  $\mu$ m. (B) Intensity of Ptr2-pHluorin or Mep3-pHluorin was quantified for each condition; intensity values were corrected for cell size and expressed in arbitrary units (a.u.) (error bars indicate mean  $\pm$  SEM; \*\*\*\*,  $P < 0.0001$  compared to WT).

**Figure S4.** (A) WT cells were grown in nutrient-rich (YPD) medium and resuspended in either fresh YPD or ammonium-rich, minimal (YNB) medium. Cells were imaged every two hours via live-cell fluorescence microscopy. Scale bar, 2  $\mu$ m. (B) TCA precipitations of total protein from log phase cells expressing Syp1-GFP grown on rich or minimal medium were resolved by SDS-PAGE. Immunoblotting using anti-GFP antibody, or anti-glucose-6-phosphate dehydrogenase (G6PDH) antibody as a loading control, was then performed.

**Figure S5.** (A) WT and *end3* $\Delta$  cells expressing Mid2-GFP were transformed with either an empty or *SYP1*-containing high-copy vector and imaged via live-cell fluorescence microscopy. Scale bar, 2  $\mu$ m. (B) WT and *end3* $\Delta$  cells expressing GFP-Snc1 were transformed with either an empty or *SYP1*-containing high-copy vector and imaged via live-cell fluorescence microscopy. Scale bar, 2  $\mu$ m. (C) Cells expressing Ptr2-pHluorin were grown on rich medium (YPD) with or without 1M sorbitol. Scale bar, 2  $\mu$ m. (D) WT and *end3* $\Delta$  cells expressing Ptr2-GFP were transformed with either an empty or *ROM1*-

containing high-copy vector and imaged via live-cell fluorescence microscopy. Scale bar, 2  $\mu\text{m}$ . (E) Intensity of Ptr2-pHluorin was quantified for each condition; intensity values were corrected for cell size and expressed in arbitrary units (a.u.) (error bars indicate mean  $\pm$  SEM; \*\*\*\*,  $P < 0.0001$  compared to WT). (F) WT and *end3 $\Delta$*  cells expressing Ptr2-GFP were transformed with either an empty, *ROM1*-, or *SYP1*-containing high-copy vector, grown in selective media containing protease inhibitors, and imaged via live-cell fluorescence microscopy. Scale bar, 2  $\mu\text{m}$ .

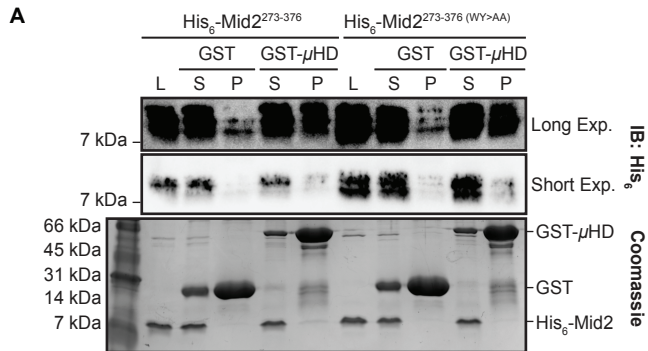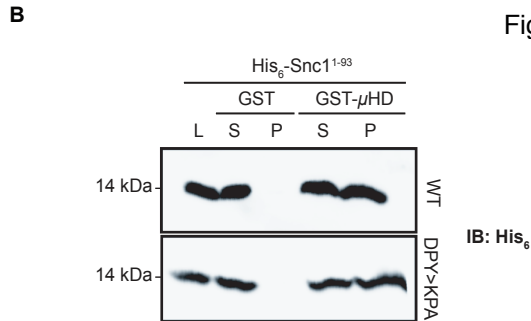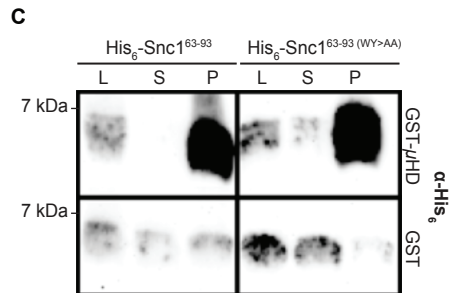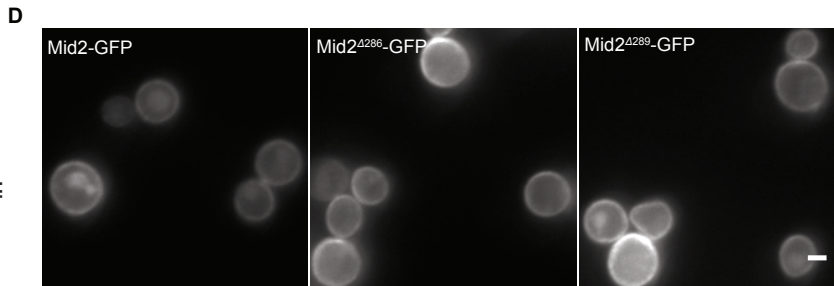

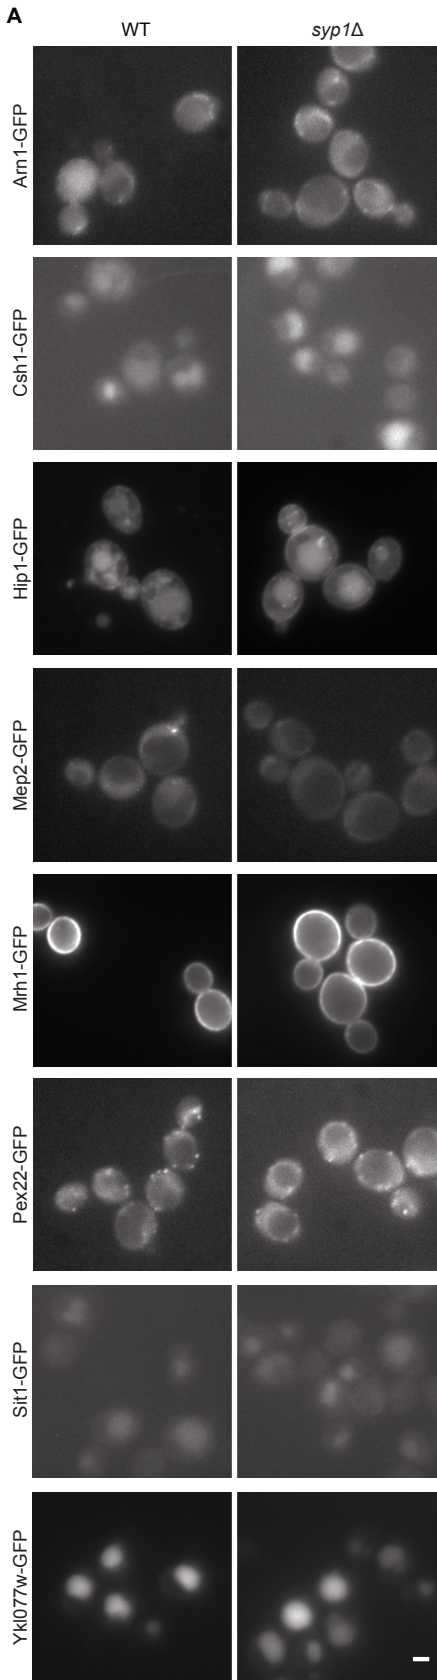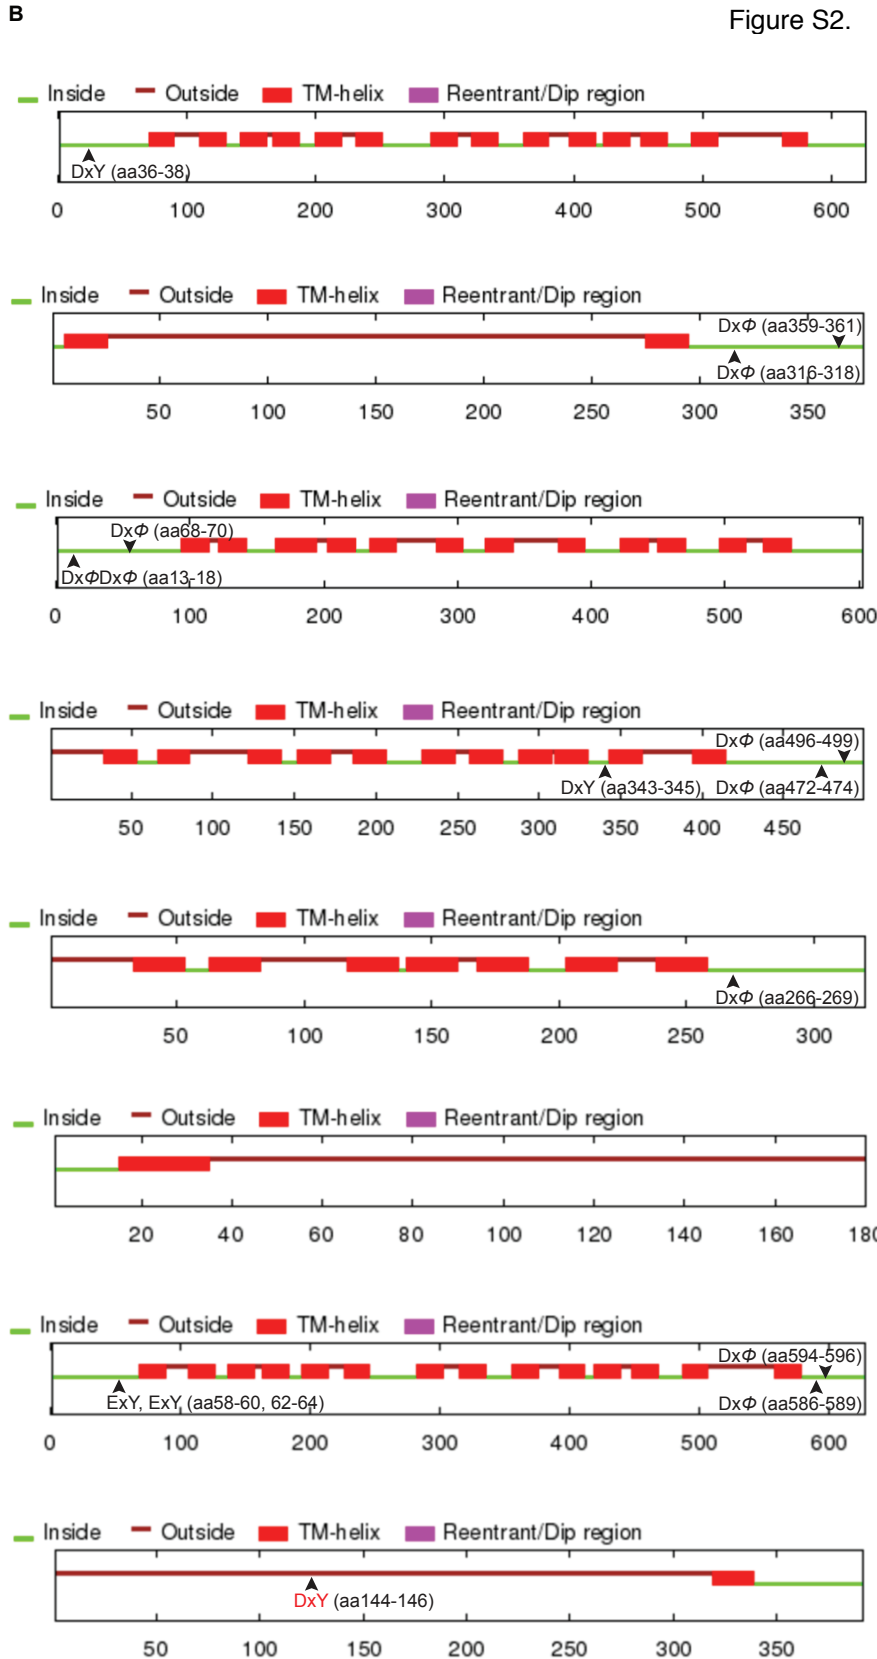

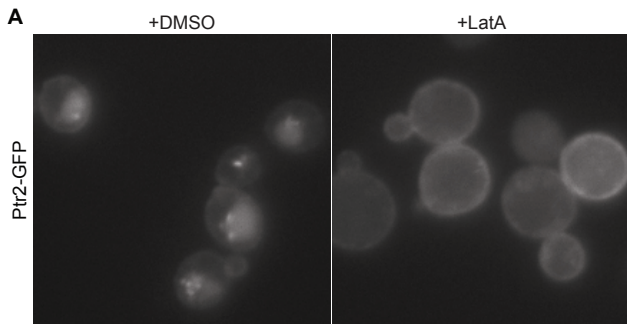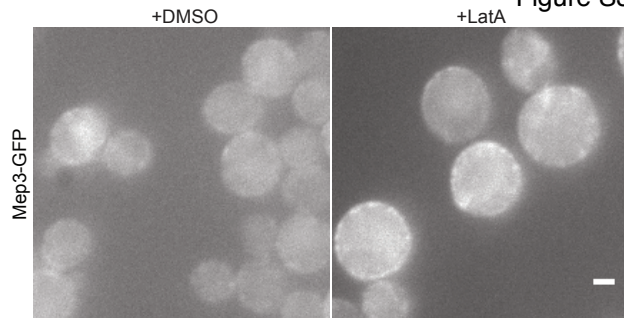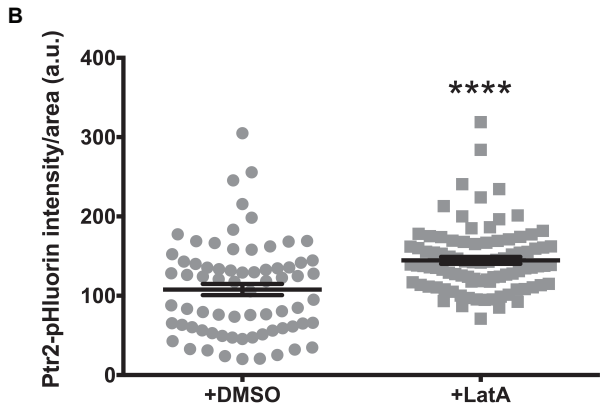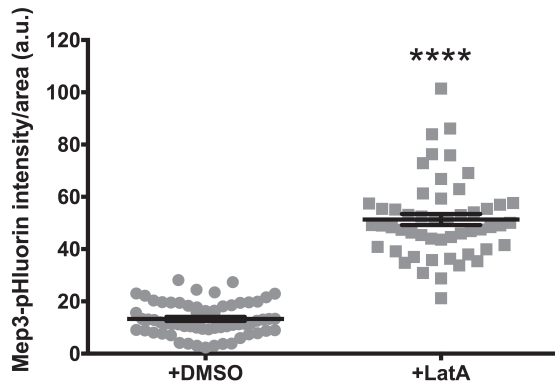

Figure S4.

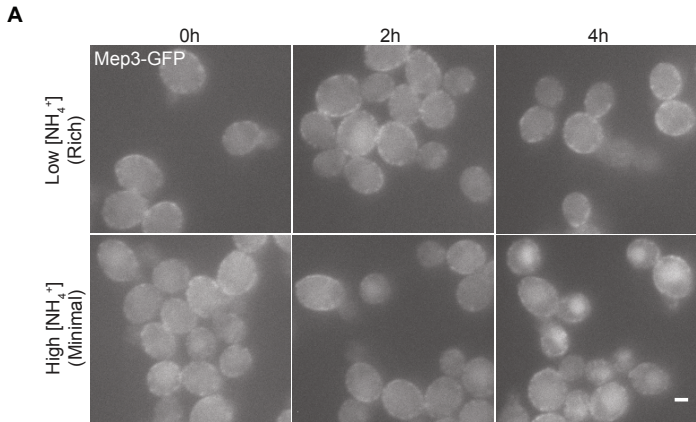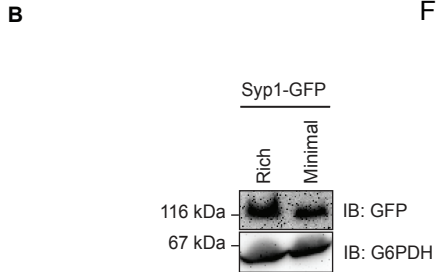

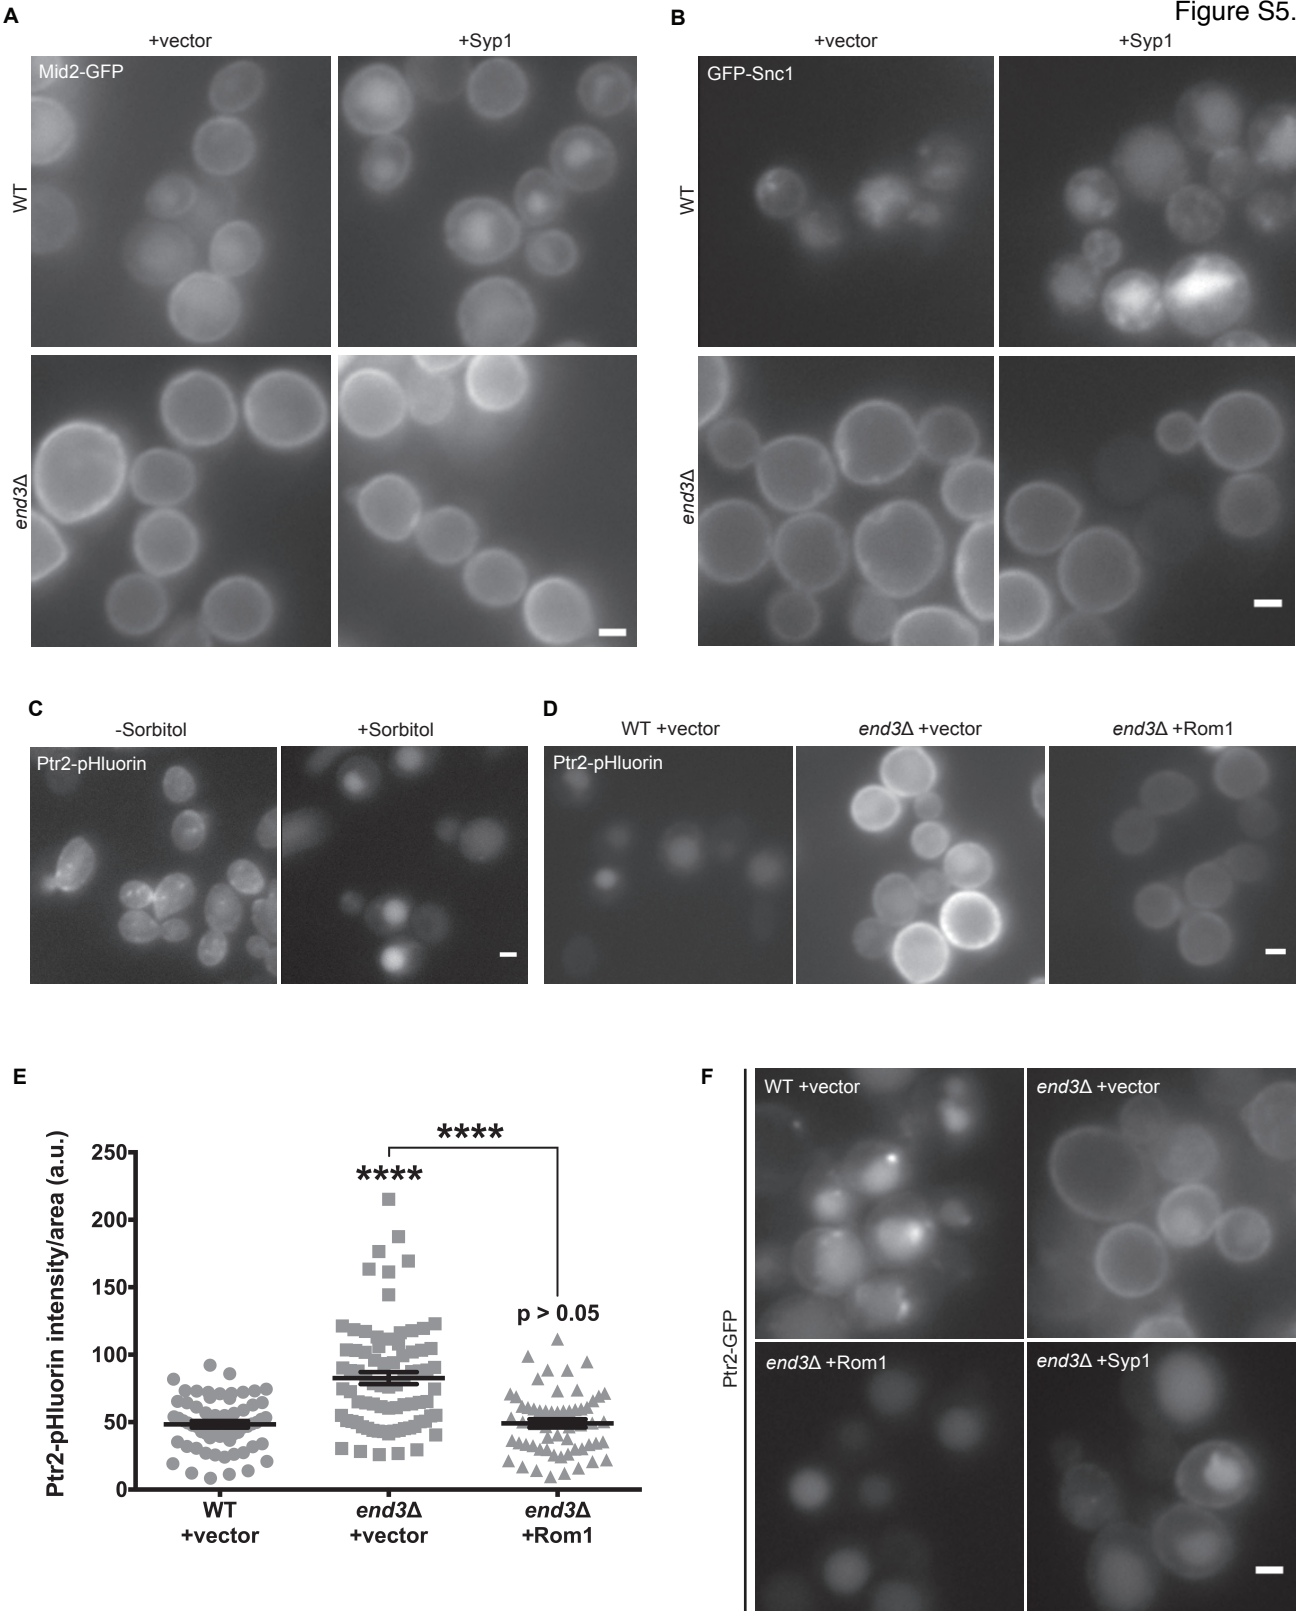



Table S1. Cargoes tested in *syp1Δ* visual screen.

| Systematic Name | Standard Name |
|-----------------|---------------|
| YAL053W         | FLC2          |
| YAL055W         | PEX22         |
| YBL017C         | PEP1          |
| YBL042C         | FUI1          |
| YBR008C         | FLR1          |
| YBR014C         | GRX7          |
| YBR043C         | QDR3          |
| YBR054W         | YRO2          |
| YBR068C         | BAP2          |
| YBR069C         | TAT1          |
| YBR086C         | IST2          |
| YBR161W         | CSH1          |
| YBR187W         | GDT1          |
| YBR199W         | KTR4          |
| YBR205W         | KTR3          |
| YBR255W         | MTC4          |
| YBR302C         | COS2          |
| YCL001W         | RER1          |
| YCL027W         | FUS1          |
| YCR024C-A       | PMP1          |
| YCR024C-B       |               |
| YCR028C         | FEN2          |
| YCR061W         |               |
| YDL010W         | GRX6          |
| YDL046W         | NPC2          |
| YDL091C         | UBX3          |
| YDL180W         |               |
| YDL211C         |               |
| YDL222C         | FMP45         |
| YDR011W         | SNQ2          |
| YDR033W         | MRH1          |
| YDR038C         | ENA5          |
| YDR039C         | ENA2          |

| Systematic Name | Standard Name |
|-----------------|---------------|
| YDR040C         | ENA1          |
| YDR046C         | BAP3          |
| YDR084C         | TVP23         |
| YDR090C         |               |
| YDR093W         | DNF2          |
| YDR233C         | RTN1          |
| YDR270W         | CCC2          |
| YDR281C         | PHM6          |
| YDR343C         | HXT6          |
| YDR345C         | HXT3          |
| YDR367W         | KEI1          |
| YDR384C         | ATO3          |
| YDR452W         | PPN1          |
| YDR456W         | NHX1          |
| YDR479C         | PEX29         |
| YDR481C         | PHO8          |
| YDR497C         | ITR1          |
| YDR508C         | GNP1          |
| YDR525W-A       | SNA2          |
| YEL017C-A       | PMP2          |
| YEL063C         | CAN1          |
| YEL065W         | SIT1          |
| YER001W         | MNN1          |
| YER056C         | FCY2          |
| YER118C         | SHO1          |
| YER145C         | FTR1          |
| YFL026W         | STE2          |
| YFL062W         | COS4          |
| YGL008C         | PMA1          |
| YGL077C         | HNM1          |
| YGL139W         | FLC3          |
| YGL200C         | EMP24         |
| YGL203C         | KEX1          |

| Systematic Name | Standard Name |
|-----------------|---------------|
| YGL225W         | VRG4          |
| YGR014W         | MSB2          |
| YGR026W         |               |
| YGR041W         | BUD9          |
| YGR055W         | MUP1          |
| YGR065C         | VHT1          |
| YGR105W         | VMA21         |
| YGR121C         | MEP1          |
| YGR125W         |               |
| YGR138C         | TPO2          |
| YGR191W         | HIP1          |
| YGR281W         | YOR1          |
| YGR295C         | COS6          |
| YHL008C         |               |
| YHL028W         | WSC4          |
| YHL036W         | MUP3          |
| YHL040C         | ARN1          |
| YHR004C         | NEM1          |
| YHR123W         | EPT1          |
| YHR132C         | ECM14         |
| YHR140W         |               |
| YHR142W         | CHS7          |
| YHR149C         | SKG6          |
| YIL005W         | EPS1          |
| YIL015W         | BAR1          |
| YIL037C         | PRM2          |
| YIL067C         |               |
| YIL117C         | PRM5          |
| YIL121W         | QDR2          |
| YIL140W         | AXL2          |
| YIL147C         | SLN1          |
| YIL158W         | AIM20         |
| YIL173W         | VTH1          |

Table S1. Cargoes tested in *syp1*Δ visual screen. Continued

| Systematic Name | Standard Name |
|-----------------|---------------|
| YJL151C         | SNA3          |
| YJL178C         | ATG27         |
| YJL186W         | MNN5          |
| YJR044C         | VPS55         |
| YJR054W         | KCH1          |
| YJR161C         | COS5          |
| YKL051W         | SFK1          |
| YKL073W         | LHS1          |
| YKL077W         | PSG1          |
| YKL165C         | MCD4          |
| YKL175W         | ZRT3          |
| YKL209C         | STE6          |
| YKR039W         | GAP1          |
| YKR088C         | TVP38         |
| YKR093W         | PTR2          |
| YKR100C         | SKG1          |
| YLL006W         | MMM1          |
| YLL028W         | TPO1          |
| YLL043W         | FPS1          |
| YLL051C         | FRE6          |
| YLR072W         | LAM6          |
| YLR080W         | EMP46         |
| YLR083C         | EMP70         |
| YLR084C         | RAX2          |
| YLR093C         | NYV1          |
| YLR138W         | NHA1          |
| YLR220W         | CCC1          |
| YLR237W         | THI7          |
| YLR297W         |               |
| YLR332W         | MID2          |
| YLR342W         | FKS1          |
| YLR353W         | BUD8          |
| YLR413W         | INA1          |

| Systematic Name | Standard Name |
|-----------------|---------------|
| YLR414C         | PUN1          |
| YML028W         | TSA1          |
| YML052W         | SUR7          |
| YML072C         | TCB3          |
| YML116W         | ATR1          |
| YML132W         | COS3          |
| YMR010W         | ANY1          |
| YMR011W         | HXT2          |
| YMR058W         | FET3          |
| YMR110C         | HFD1          |
| YMR171C         | EAR1          |
| YMR183C         | SSO2          |
| YMR221C         | FMP42         |
| YMR253C         |               |
| YMR266W         | RSN1          |
| YMR313C         | TGL3          |
| YMR319C         | FET4          |
| YNL058C         |               |
| YNL065W         | AQR1          |
| YNL087W         | TCB2          |
| YNL115C         |               |
| YNL130C         | CPT1          |
| YNL142W         | MEP2          |
| YNL176C         | TDA7          |
| YNL194C         |               |
| YNL217W         |               |
| YNL238W         | KEX2          |
| YNL268W         | LYP1          |
| YNL279W         | PRM1          |
| YNL283C         | WSC2          |
| YNL305C         | BXI1          |
| YNL326C         | PFA3          |
| YNL336W         | COS1          |

| Systematic Name | Standard Name |
|-----------------|---------------|
| YNR028W         | CPR8          |
| YNR055C         | HOL1          |
| YNR056C         | BIO5          |
| YNR061C         |               |
| YOL007C         | CSI2          |
| YOL019W         |               |
| YOL020W         | TAT2          |
| YOL047C         | LDS2          |
| YOL084W         | PHM7          |
| YOL088C         | MPD2          |
| YOL105C         | WSC3          |
| YOR008C         | SLG1          |
| YOR086C         | TCB1          |
| YOR099W         | KTR1          |
| YOR104W         | PIN2          |
| YOR153W         | PDR5          |
| YOR161C         | PNS1          |
| YOR165W         | SEY1          |
| YOR273C         | TPO4          |
| YOR292C         |               |
| YOR320C         | GNT1          |
| YOR327C         | SNC2          |
| YPL019C         | VTC3          |
| YPL053C         | KTR6          |
| YPL057C         | SUR1          |
| YPL058C         | PDR12         |
| YPL087W         | YDC1          |
| YPL156C         | PRM4          |
| YPL221W         | FLC1          |
| YPL265W         | DIP5          |
| YPR037C         | ERV2          |
| YPR075C         | OPY2          |
| YPR079W         | MRL1          |

Table S1. Cargoes tested in *syp1* $\Delta$  visual screen. Continued

| Systematic Name | Standard Name |
|-----------------|---------------|
| YPR124W         | CTR1          |
| YPR138C         | MEP3          |
| YPR149W         | NCE102        |
| YPR156C         | TPO3          |
| YPR159W         | KRE6          |
